# Supplementary material for: Vacuum-filtration assisted layer-by-layer strategy to design MXene/carbon nanotube@MnO2 all-in-one supercapacitors
Source: Royal Society of Chemistry journal article supplement (doi:10.1039/d1ta06089a), 2021-01-01
Supplement: d1ta06089a1.pdf [file d1ta06089a1.pdf]

## Supplementary Information

### Vacuum-Filtration Assisted Layer-By-Layer Strategy to Design MXene/Carbon Nanotube@MnO<sub>2</sub> All-In-One Supercapacitors

*Ya-Li Huang and Shao-Wei Bian\**

National Engineering Research Center for Dyeing and Finishing of Textiles, College of Chemistry, Chemical Engineering and Biotechnology, Donghua University, Shanghai 201620

E-mail: swbian@dhu.edu.cn

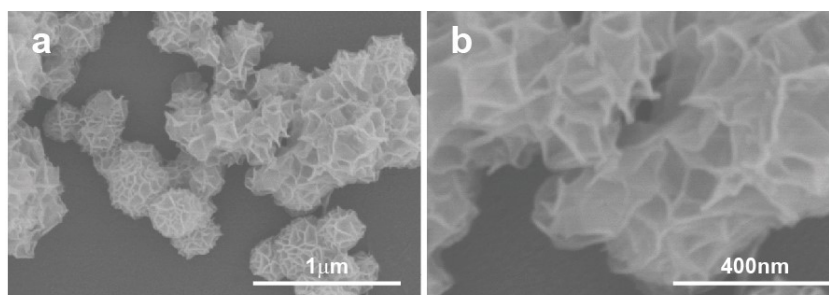

**Figure s1.** (a and b) SEM images of MnO<sub>2</sub> nanosheets.

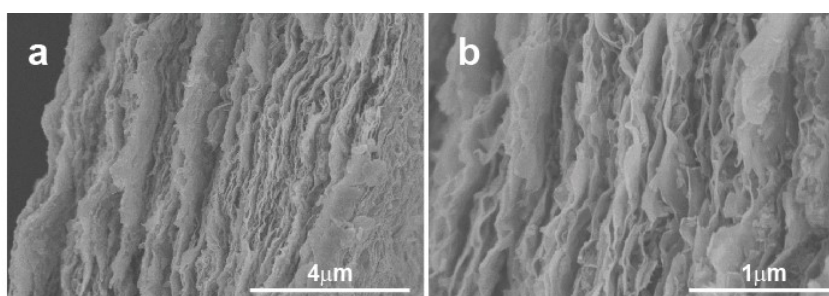

**Figure s2.** (a and b) SEM images of the used MXene/CNT@MnO<sub>2</sub> film electrode at

5000 cycles.
